# Supplementary material for: New haliclamines E and F from the Arctic sponge Haliclona viscosa
Source: Royal Society of Chemistry journal article supplement (doi:10.1039/b904157e), 2009-01-01
Supplement: b904157e.pdf [file b904157e.pdf]

## ELECTRONIC SUPPLEMENTARY INFORMATION

### New Haliclamines E and F from the Arctic Sponge *Haliclona viscosa*

Gesine Schmidt, Christoph Timm and Matthias Köck\*

#### Figures.

Figure SI-1. Comparison of mass spectra of the natural and synthetic compound **1**. – (A). Mass trace obtained from an LCMS experiment of the crude extract of *Haliclona viscosa*. – (B). Synthetic compound under standard ESI conditions. – (C). Synthetic compound under API-CID-MS/MS conditions. The sections show details of the doubly charged molecular ion and the singly charged fragments.....2

Figure SI-2. Detail and full scan (box) of a <sup>1</sup>H-NMR spectrum (300 MHz, CDCl<sub>3</sub>) of the synthetic haliclamine E (**1**).....3

Figure SI-3. Detail and full scan (box) of a <sup>13</sup>C-NMR spectrum (75 MHz, CDCl<sub>3</sub>) of the synthetic haliclamine E (**1**).....3

Figure SI-4. Comparison of mass spectra of the natural and synthetic compound **2**. – (A). Mass trace obtained from an LCMS experiment of the crude extract of *Haliclona viscosa*. – (B). Synthetic compound under standard ESI conditions. The section shows a detail of the doubly charged molecular ion. – (C). Synthetic compound under API-CID-MS/MS conditions. The section shows a detail of the doubly charged molecular ion superimposed by the singly charged fragment.....4

Figure SI-5. Detail and full scan (box) of a <sup>1</sup>H-NMR spectrum (300 MHz, CDCl<sub>3</sub>) of the synthetic haliclamine F (**2**).....5

Figure SI-6. Detail and full scan (box) of a <sup>13</sup>C-NMR spectrum (75 MHz, CDCl<sub>3</sub>) of the synthetic haliclamine F (**2**).....5

Figure SI-7. Synthetic pathway of haliclamines E (**1**), F (**2**), C (**3**) and D (**4**). – 1. Synthesis of *N*-oxide dimers. – 2./3. Synthesis of cyclostelletamines. – 4. Synthesis of haliclamines (refer to paragraphs in the text). .....7

#### Tables.

Table SI 1. <sup>1</sup>H and <sup>13</sup>C NMR data of Haliclamines E (**1**) and F (**2**) in CDCl<sub>3</sub>. The compounds in the solution were present as TFA-salts. .... 6

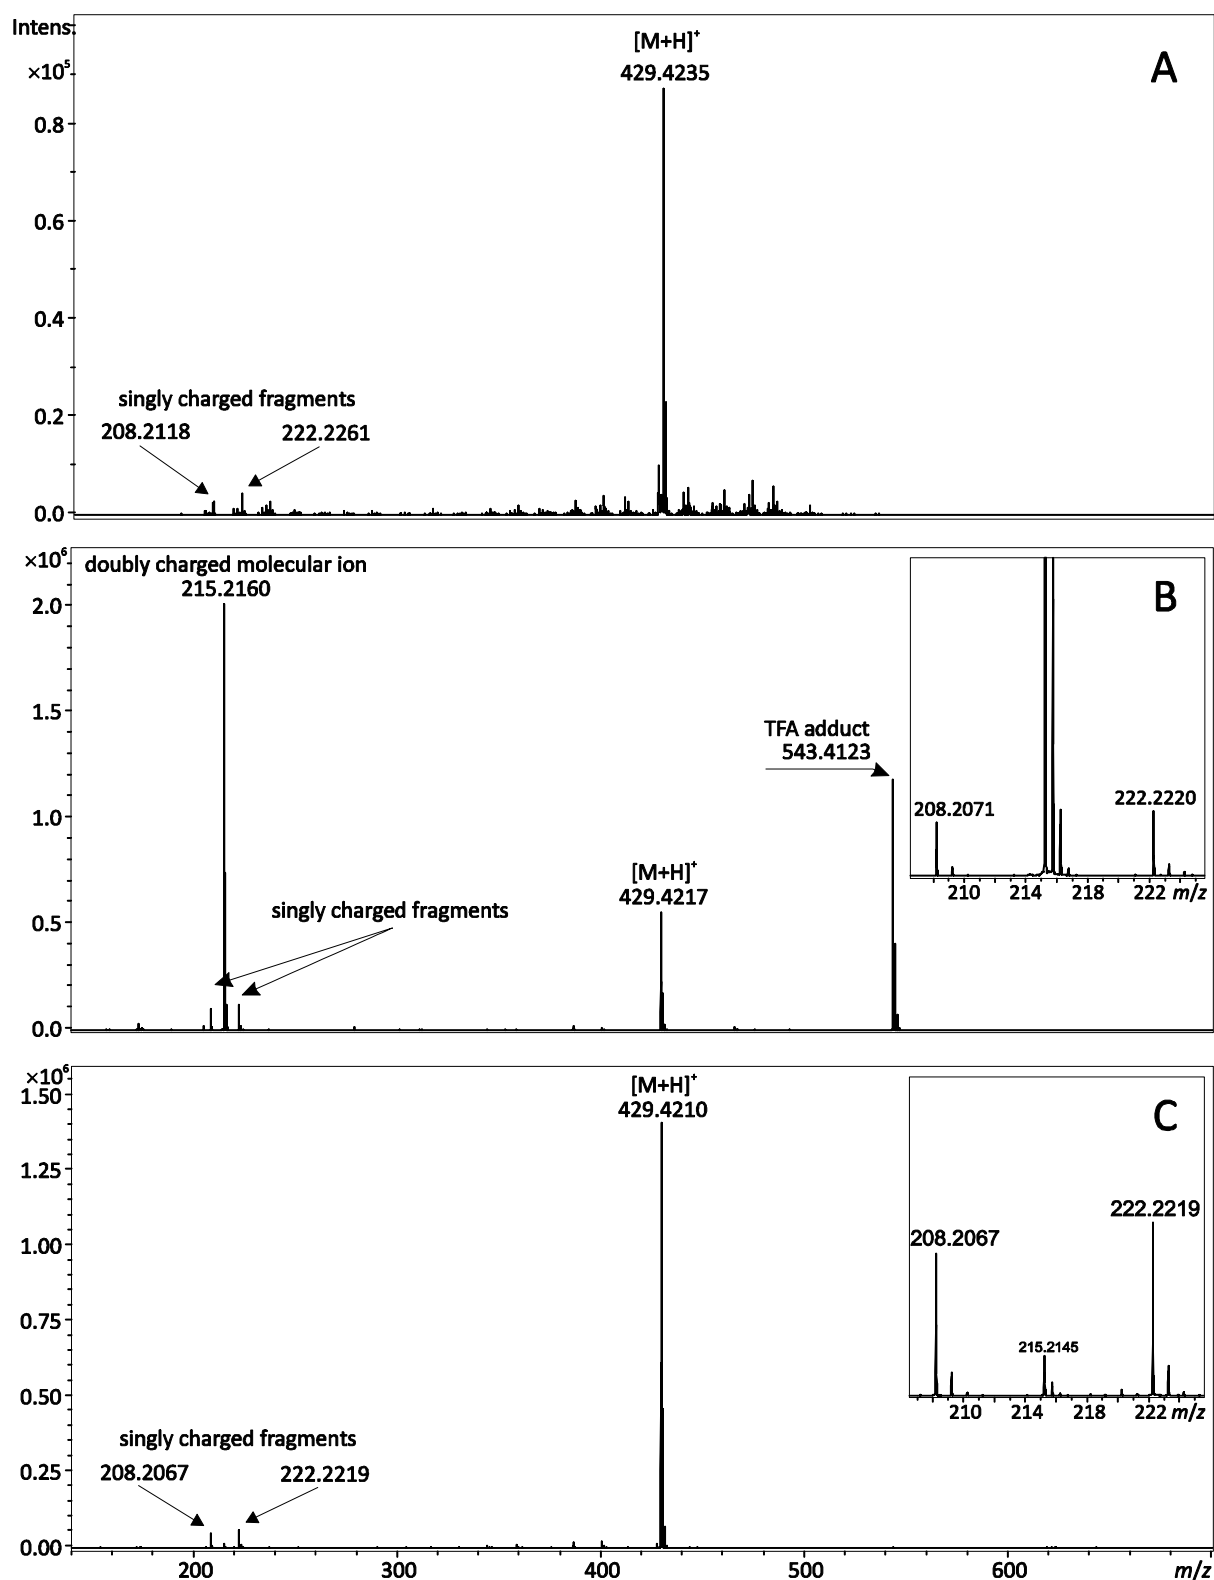

Figure SI-1. Comparison of mass spectra of the natural and synthetic compound **1**. – (A). Mass trace obtained from an LCMS experiment of the crude extract of *Haliclona viscosa*. – (B). Synthetic compound under standard ESI conditions. – (C). Synthetic compound under API-CID-MS/MS conditions. The sections show details of the doubly charged molecular ion and the singly charged fragments.

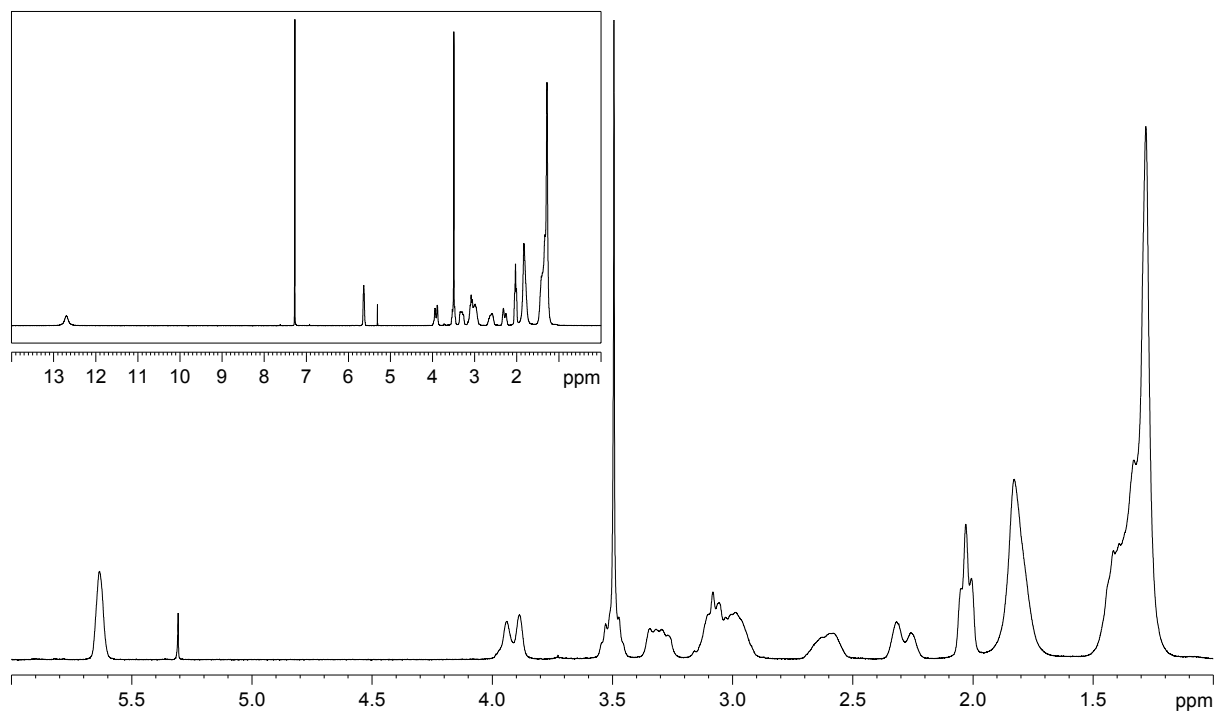

Figure SI-2. Detail and full scan (box) of a  $^1\text{H-NMR}$  spectrum (300 MHz,  $\text{CDCl}_3$ ) of the synthetic haliclamine E (**1**).

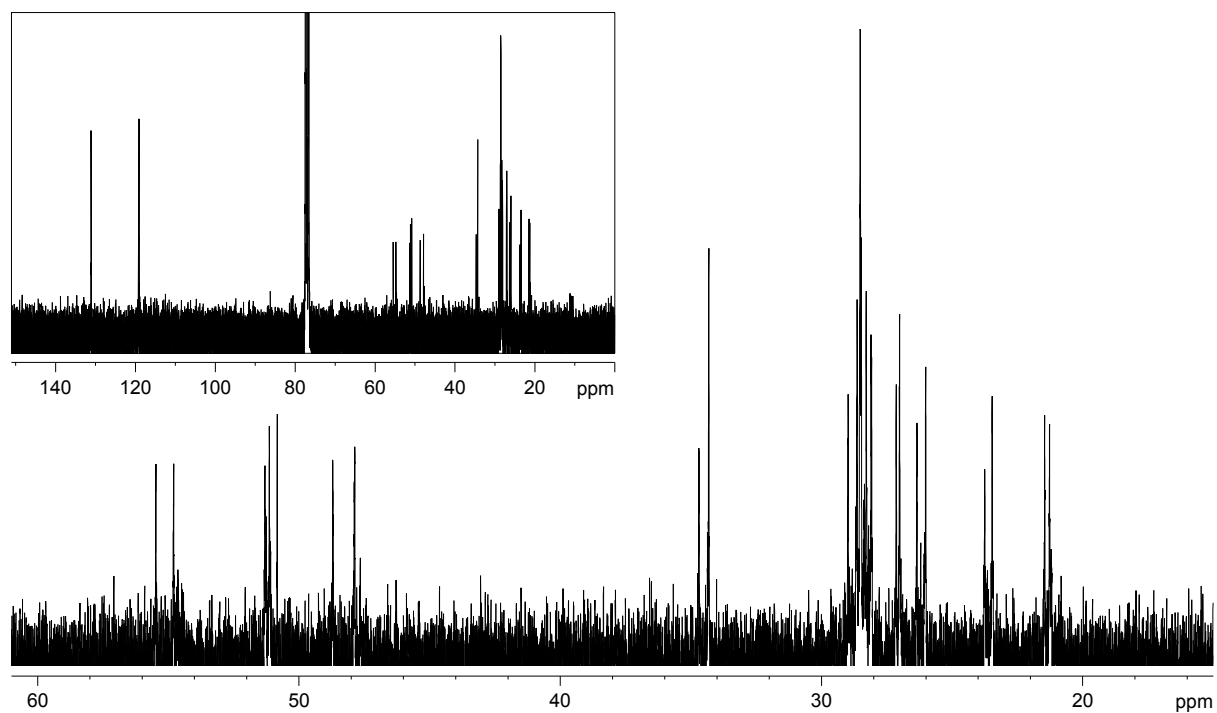

Figure SI-3. Detail and full scan (box) of a  $^{13}\text{C-NMR}$  spectrum (75 MHz,  $\text{CDCl}_3$ ) of the synthetic haliclamine E (**1**).

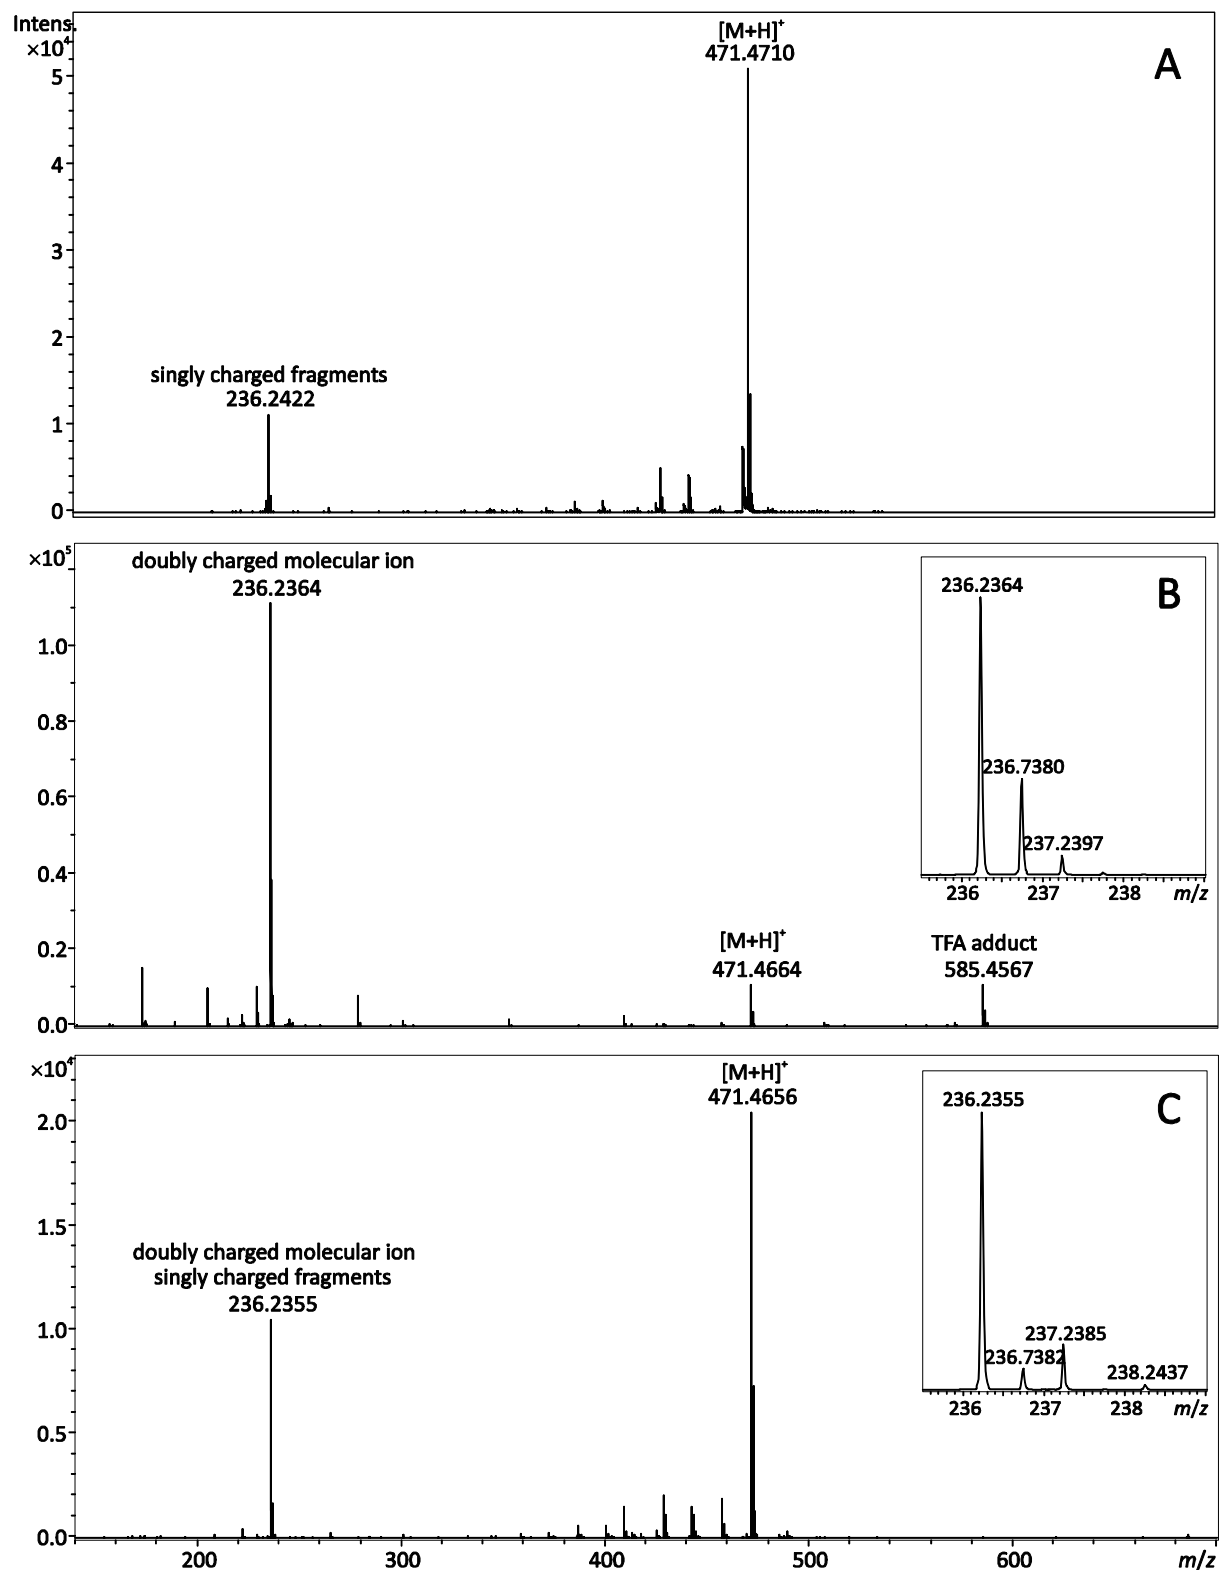

Figure SI-4. Comparison of mass spectra of the natural and synthetic compound **2**. – (A). Mass trace obtained from an LCMS experiment of the crude extract of *Haliclona viscosa*. – (B). Synthetic compound under standard ESI conditions. The section shows a detail of the doubly charged molecular ion. – (C). Synthetic compound under API-CID-MS/MS conditions. The section shows a detail of the doubly charged molecular ion superimposed by the singly charged fragment.

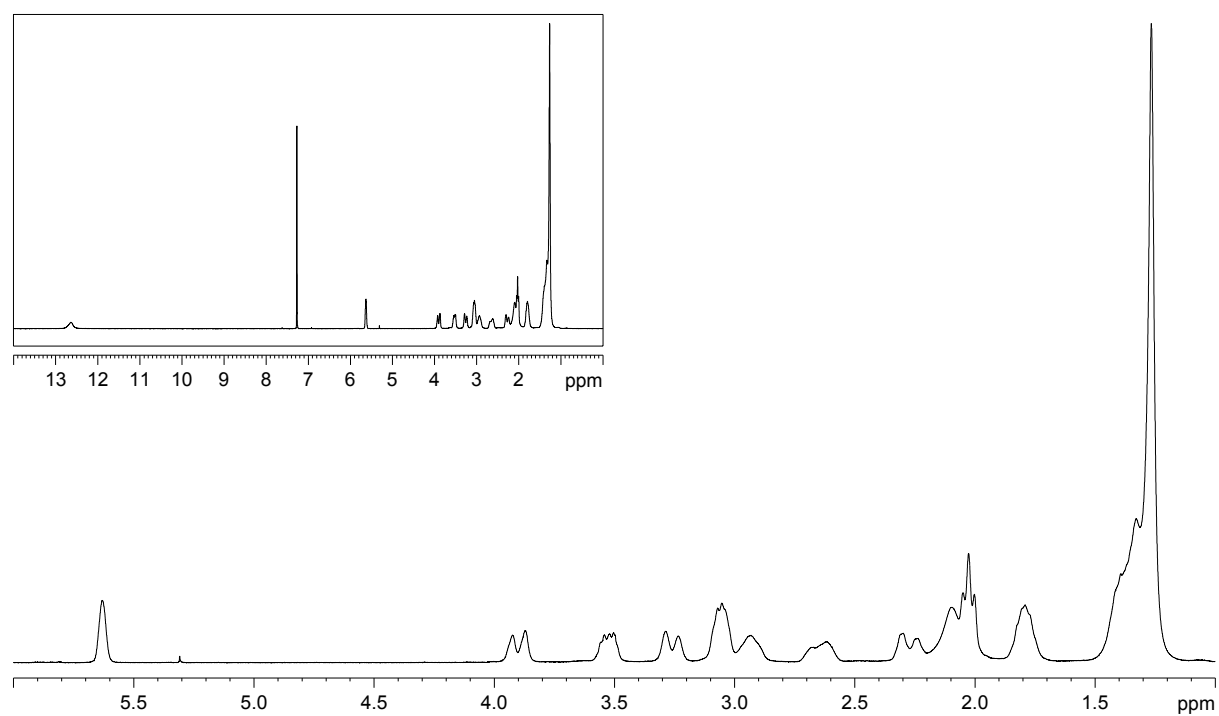

Figure SI-5. Detail and full scan (box) of a <sup>1</sup>H-NMR spectrum (300 MHz, CDCl<sub>3</sub>) of the synthetic haliclamine F (**2**).

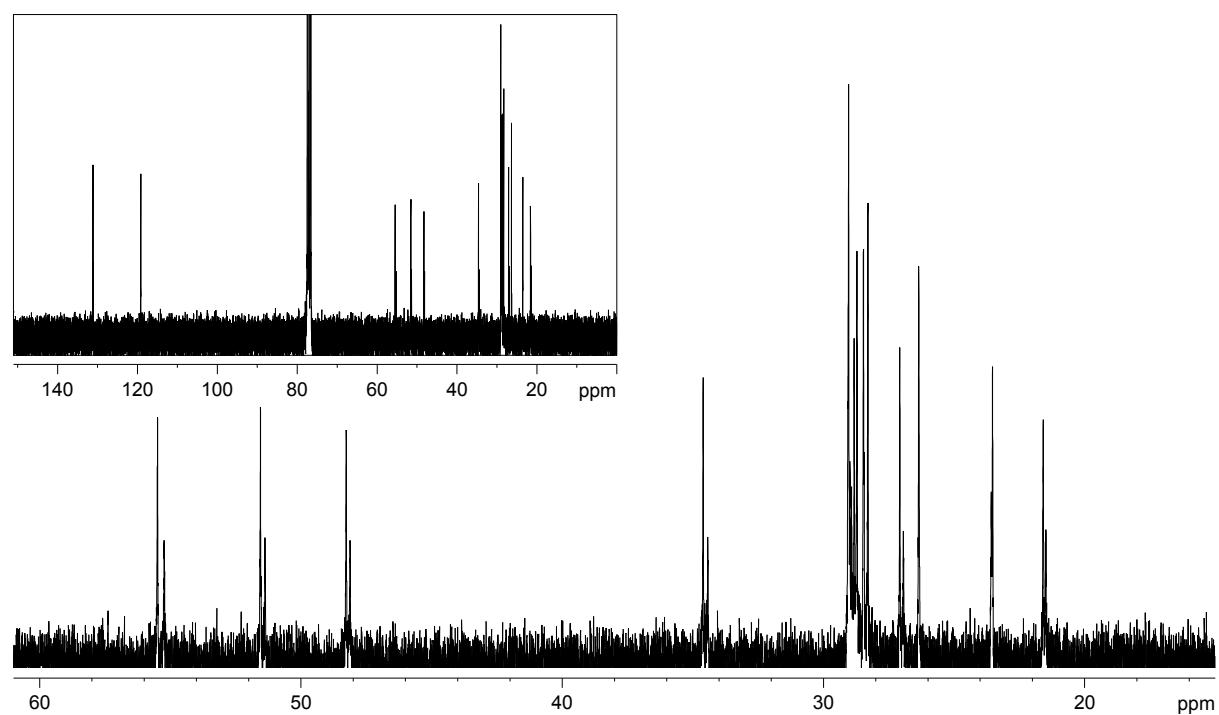

Figure SI-6. Detail and full scan (box) of a <sup>13</sup>C-NMR spectrum (75 MHz, CDCl<sub>3</sub>) of the synthetic haliclamine F (**2**).

Table SI-1.  $^1\text{H}$  and  $^{13}\text{C}$  NMR data of Haliclamines E (**1**) and F (**2**) in  $\text{CDCl}_3$ . The compounds in the solution were present as TFA-salts.

| Haliclamine E ( <b>1</b> ) |                                 |                                                         | Haliclamine F ( <b>2</b> ) |                                 |                                    |
|----------------------------|---------------------------------|---------------------------------------------------------|----------------------------|---------------------------------|------------------------------------|
| pos.                       | $\delta\text{H}$                | $\delta\text{C}$                                        | pos.                       | $\delta\text{H}$                | $\delta\text{C}$                   |
| NH,<br>NH'                 | 12.62 (br. s, 2 H)              |                                                         | NH,<br>NH'                 | 12.62 (s, 2 H)                  |                                    |
| 2                          | 3.90 (d, 2 H, 15.7 Hz)          | 51.1                                                    | 2                          | 3.89 (d, 2 H, 15.8 Hz)          | 51.5                               |
| 2'                         | 3.21-3.37 (m, 2 H)              | 50.8                                                    | 2'                         | 3.25 (d, 2 H, 16.0 Hz)          | 51.4                               |
| 3, 3'                      |                                 | 131.1                                                   | 3, 3'                      |                                 | 131.1                              |
| 4, 4'                      | 5.62 (s, 2 H)                   | 119.1                                                   | 4, 4'                      | 5.62 (s, 2 H)                   | 119.1                              |
| 5                          | 2.51-2.69 (m, 2 H)              | 21.5                                                    | 5                          | 2.55-2.72 (m, 2 H)              | 21.6                               |
| 5'                         | 2.27 (d, 2 H, 17.3 Hz)          | 21.8                                                    | 5'                         | 2.26 (d, 2 H, 18.5 Hz)          | 21.5                               |
| 6                          | 3.34-3.55 (m, 2 H)              | 48.7                                                    | 6                          | 3.46-3.58 (m, 2 H)              | 48.3                               |
| 6'                         | 2.87-3.16 (m, 6 H) <sup>a</sup> | 47.9                                                    | 6'                         | 2.85-3.11 (m, 6 H) <sup>b</sup> | 48.1                               |
| 7, 7'                      | 2.20 (t, 4 H, 6.6 Hz)           | 34.3, 34.7                                              | 7, 7'                      | 2.01 (t, 4 H, 7.1 Hz)           | 34.4, 34.6                         |
| 8-13,<br>8'-14'            | 1.18-1.49 (m, 26 H)             | 26.0, 26.4,<br>27.0, 27.1,<br>27.2, 28.0-<br>28.7, 29.0 | 8-15,<br>8'-15'            | 1.18-1.49 (m, 32 H)             | 26.4, 27.0,<br>27.1, 28.3-<br>29.0 |
| 14, 15'                    | 1.72-1.89 (4 H, m)              | 23.5, 23.8                                              | 16, 16'                    | 1.70-1.85 (m, 4 H)              | 23.5                               |
| 15, 16'                    | 2.87-3.16 (m, 6 H) <sup>a</sup> | 54.8, 55.5                                              | 17, 17'                    | 2.85-3.11 (m, 6 H) <sup>b</sup> | 55.2, 55.5                         |

<sup>a</sup> Assignments are interchangeable. <sup>b</sup> Assignments are interchangeable.

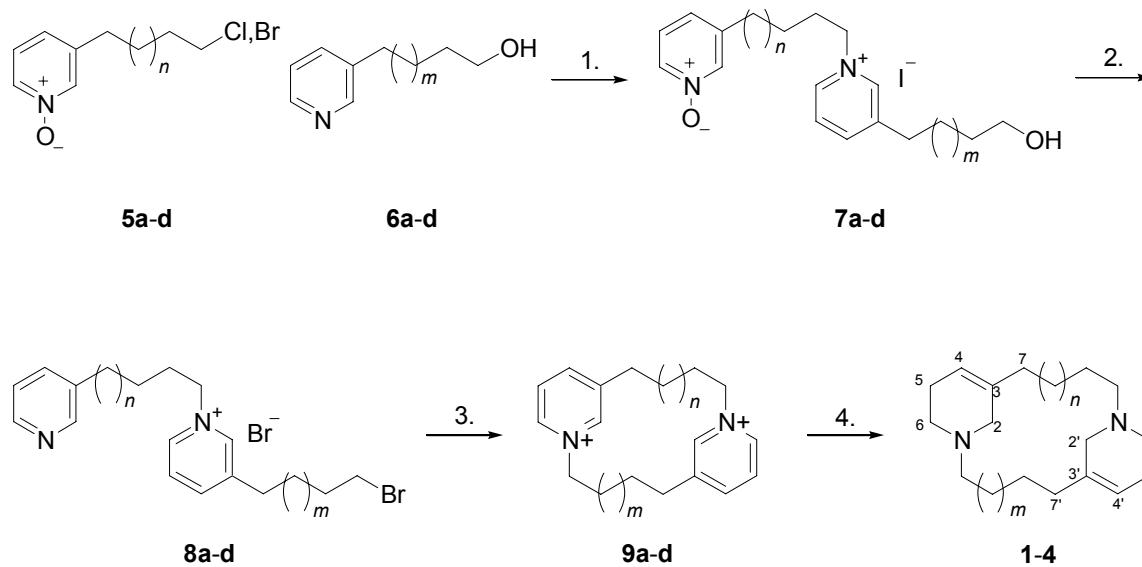

**a = 1:**  $n = 6, m = 7$ ;   **b = 2:**  $n = 8, m = 8$ ;   **c = 3:**  $n = 6, m = 8$ ;   **d = 4:**  $n = 7, m = 8$

Figure SI-7. Synthetic pathway of haliclamine E (**1**), F (**2**), C (**3**) and D (**4**). – 1. Synthesis of *N*-oxide dimers. – 2./3. Synthesis of cyclostelletamines. – 4. Synthesis of haliclamine (refer to paragraphs in the text).
